# Supplementary material
Source: publisher site journal article supplement (https://www.dovepress.com/article/supplementary_file/595349/Revised%20supplementary%20material.docx)
Supplement: Supplementary file 1 [file Revised%20supplementary%20material.docx]

**Supplementary Materials - Index**

| **Supplementary Tables and figures** |  |
| --- | --- |
| Table S1: Search strategy | *page 2* |
| Figure S1: The flow diagram of literature screening | *Page 3* |

**Supplementary Tables**

Table S1 Search strategy

| Database | Search strategy | results |
| --- | --- | --- |
| Pubmed | #1 "nanostructures"[MeSH Terms] OR "nanoparticles"[MeSH Terms] OR "Nanostructure"[Title/Abstract] OR "Nanomaterials"[Title/Abstract] OR "Nanomaterial"[Title/Abstract] OR "nanostructured materials"[Title/Abstract] OR "material nanostructured"[Title/Abstract] OR "materials nanostructured"[Title/Abstract] OR "nanostructured material"[Title/Abstract] OR "Nanomaterials"[Title/Abstract] OR "Nanotechnology"[Title/Abstract] OR "Nanoparticle"[Title/Abstract] OR "nanocrystalline materials"[Title/Abstract] OR "material nanocrystalline"[Title/Abstract] OR "materials nanocrystalline"[Title/Abstract] OR "nanocrystalline material"[Title/Abstract] OR "Nanocrystals"[Title/Abstract] OR "Nanocrystal"[Title/Abstract]  #2 "cardiotoxicity"[MeSH Terms] OR "cardiac toxicity"[Title/Abstract] OR "cardiac toxicities"[Title/Abstract] OR "toxicity cardiac"[Title/Abstract] OR "cardio* toxicit*"[Title/Abstract] OR "myocard* toxicit*"[Title/Abstract] OR "heart toxicit*"[Title/Abstract]  #3 "doxorubicin*"[Title/Abstract] OR "cisplatin*"[Title/Abstract] OR "paclitaxel*"[Title/Abstract] OR "adriamycine*"[Title/Abstract] OR "daunorubicin*"[Title/Abstract] OR "epirubicin*"[Title/Abstract] OR "mitomycin*"[Title/Abstract] OR "pirarubicin*"[Title/Abstract]  #4 ("1900/01/01"[Date - Publication] : "2025/07/01"[Date - Publication])  #5 #1 AND#2  #6 #5 NOT #3  #7 #6 AND #4 | 160 |

#: Search query; *:

Records identified from:

PubMed (n = 160)

Records screened

(n = 160)

Reports assessed for eligibility

(n = 160)

Reports excluded:

Using nanomaterials to mitigate cardiotoxicity (n=28)

Low relevance to the topic (n = 24)

Studies included in review

(n = 108)

**Identification of studies via databases**

**Identification**

**Screening**

**Included**

No duplicate records

Figure S1. The flow diagram of literature screening
